# Supplementary material
Source: PubMed Central journal article supplement (PMC2747827)
Supplement: supp_8_9_1397__1.pdf [file supp_8_9_1397__1.pdf]

**Figure S1.** In DYF1 $\Delta$  cells, the *neo3* cassette is integrated at the expected position within the *DYF1* locus. A. A scheme showing the predicted organization of the wildtype and disrupted *DYF1* loci. The grey boxes show portions of the locus subcloned onto the targeting fragment. Arrows mark the positions of diagnostic primers used for amplification of the junction between *neo3* and the flanking region of the *DYF1* locus that is positioned outside of the targeting fragment. B. A PCR analysis of the genomic DNA of wild-type and DYF1 $\Delta$  cells using either a pair of primers marked in A or a pair of control primers designed to amplify a non-targeted *NRK1* locus. As expected, a 2.7 kb amplification product is seen in the DYF1 $\Delta$  sample but not in wild-type cells indicating that the *neo3* cassette is integrated at the desired position.

**Figure S2.** An extended cell cycle cannot explain hyperglutamylation of axonemal microtubules. A-B3. Wild-type and PF20 $\Delta$  cells were stained side-by side with the monoclonal anti-polyglutamylated tubulin antibody, ID5 (A) and polyclonal anti-tubulin antibodies SG (A1). A2 shows a merged image. Wildtype cells were fed with black India ink and are identified by phase contrast (A3). B. A growth curve graph of wild-type and PF20 $\Delta$  grown in MEPP medium. Bars represent 10  $\mu$ m.

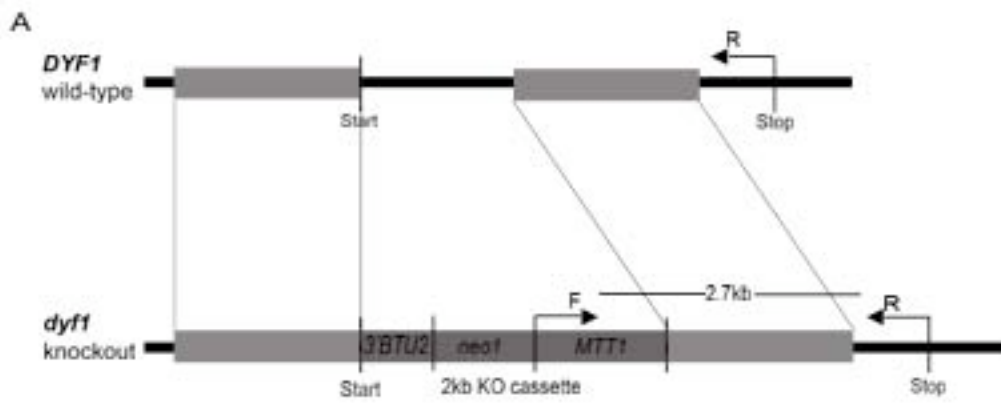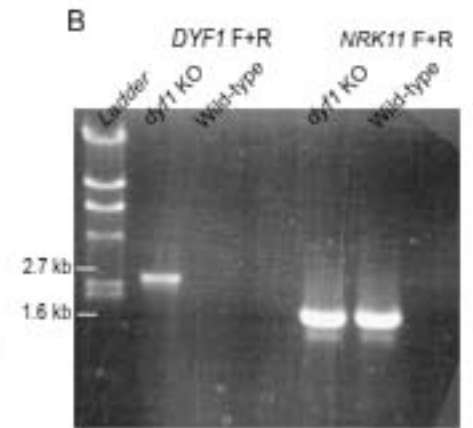

Figure S1

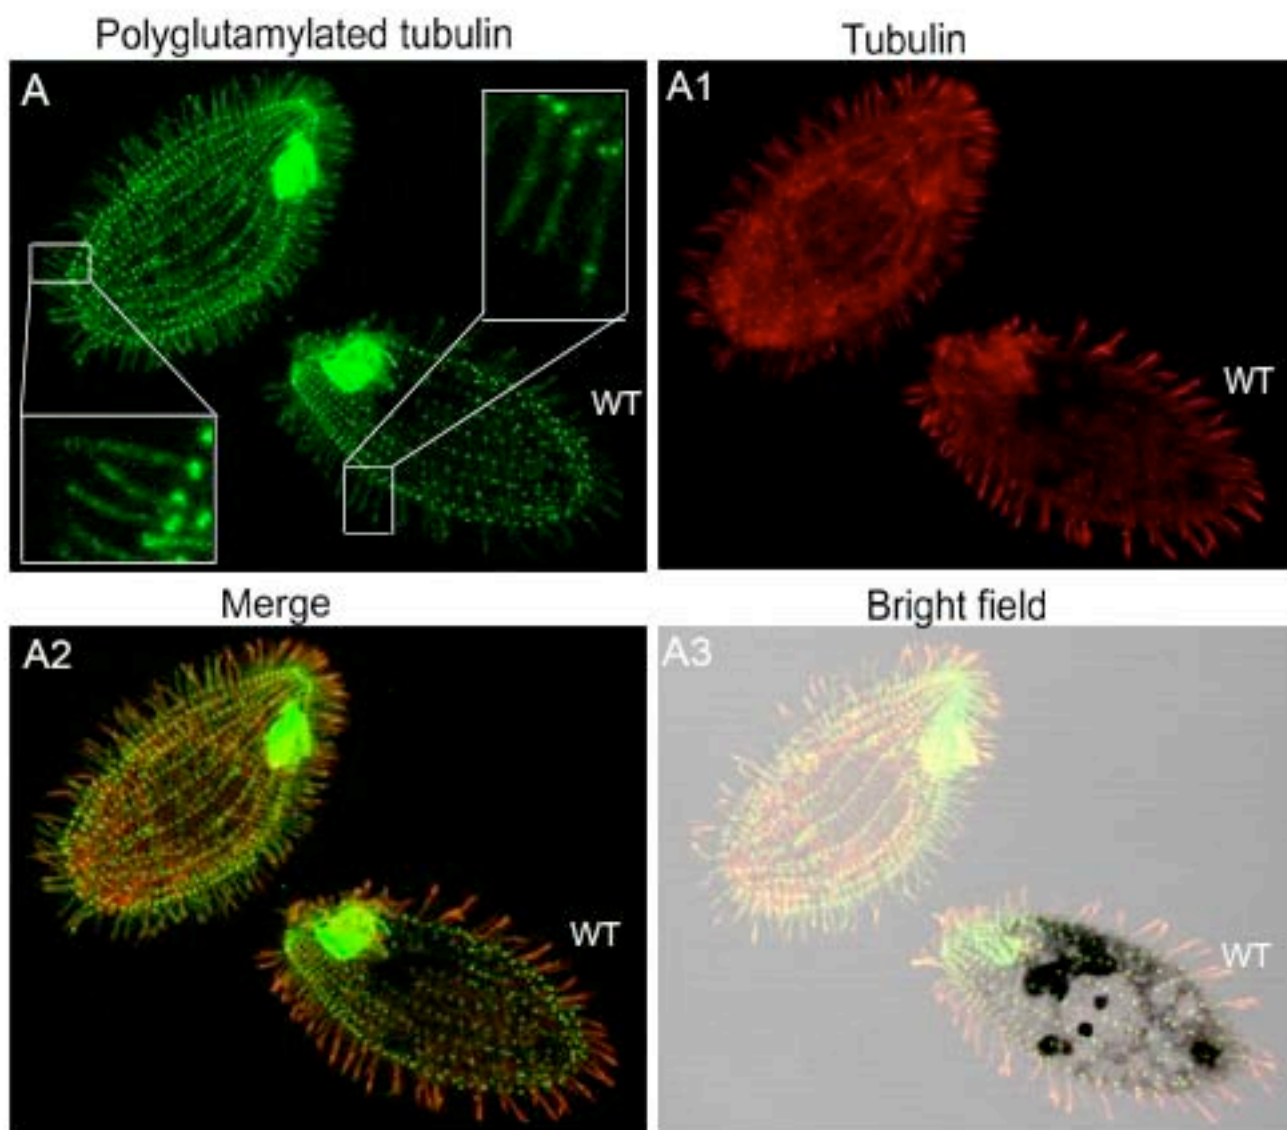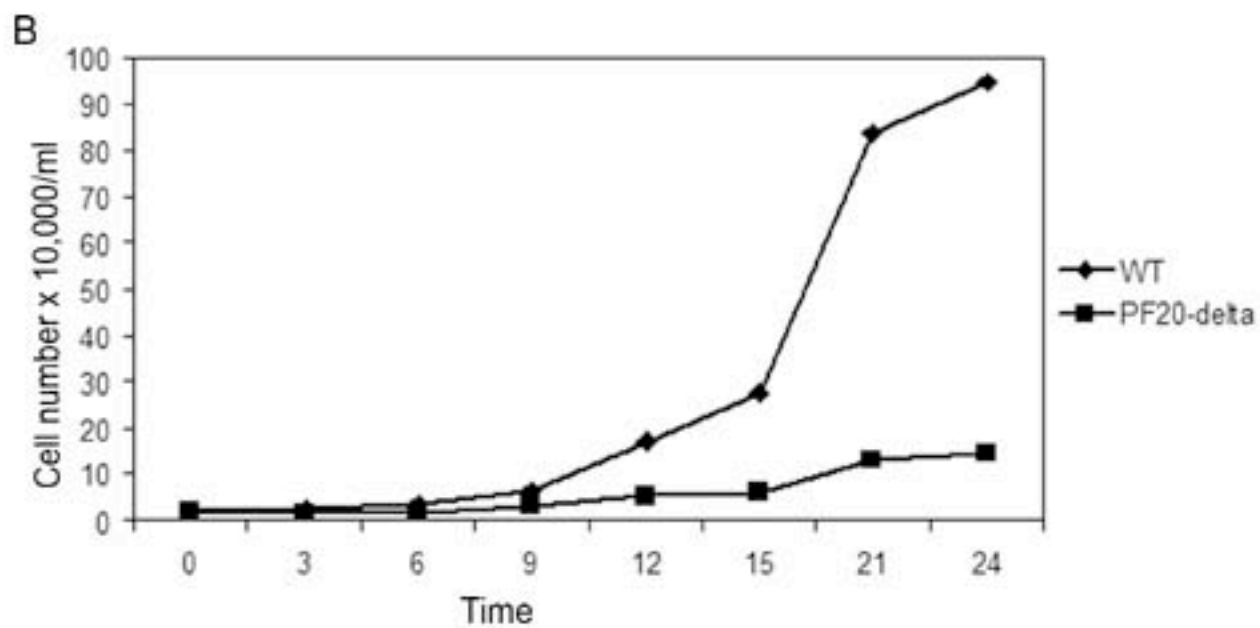

Figure S2
